# Supplementary material
Source: Springer Nature journal article supplement (https://www.springermedizin.de/resource/supplementary/13046_2012_597_MOESM4_ESM.pdf/9662602)

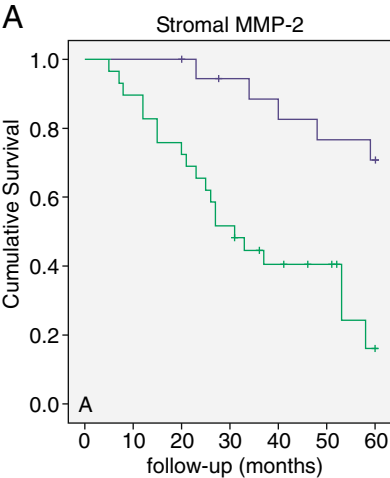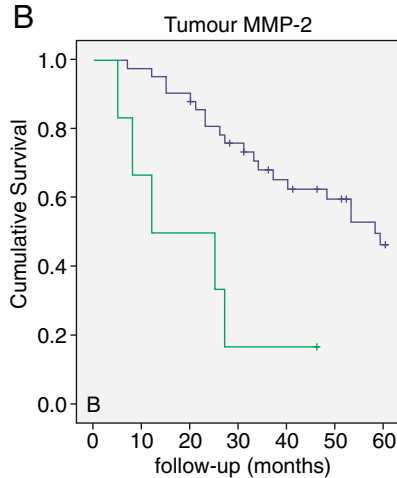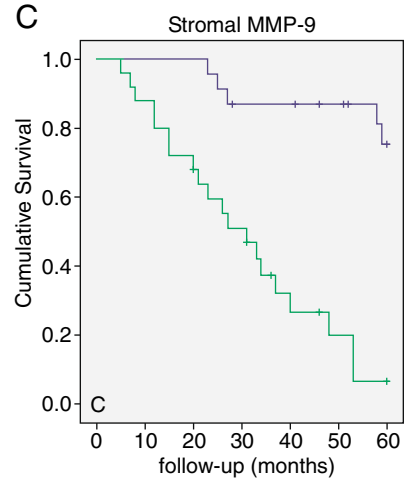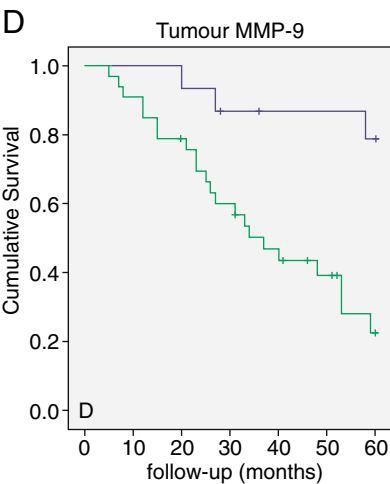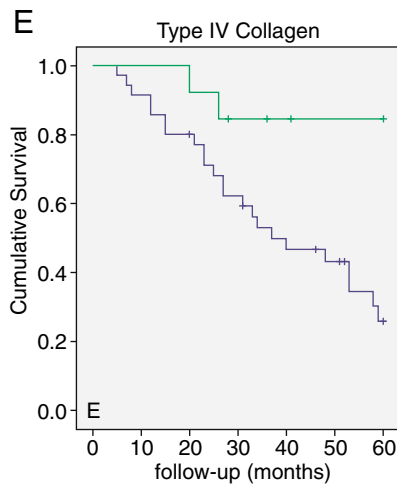

— Low expression  
— High expression  
+ Low-censored  
+ High-censored

Supplement: MOESM4 [file 9662602]
